# Supplementary material for: Photo-responsive reversible micelles based on azobenzene-modified poly(carbonate)s via azide–alkyne click chemistry
Source: Royal Society of Chemistry journal article supplement (doi:10.1039/c4ra07345b), 2014-01-01
Supplement: c4ra07345b1.pdf [file c4ra07345b1.pdf]

**Supporting Information for “Photo-responsive reversible micelles based on azobenzene-modified poly(carbonate)s via Azide-Alkyne click chemistry”**

Ding Hu, Yefei Li, Yile Niu, Ling Li, Jingwen He, Xiangyu Liu, Xinnian Xia,

Yanbing Lu\*, Yuanqin Xiong and Weijian Xu

Institute of Polymer Science and Engineering, College of Chemistry & Chemical Engineering, Hunan University, Changsha 410082, China

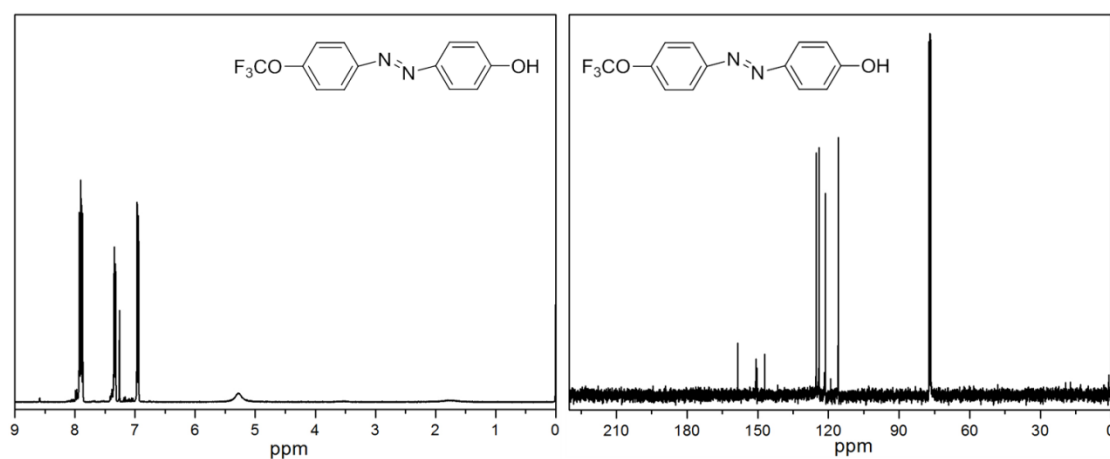

**Fig. S1** <sup>1</sup>H and <sup>13</sup>C NMR (in CDCl<sub>3</sub>) spectra of compound 1

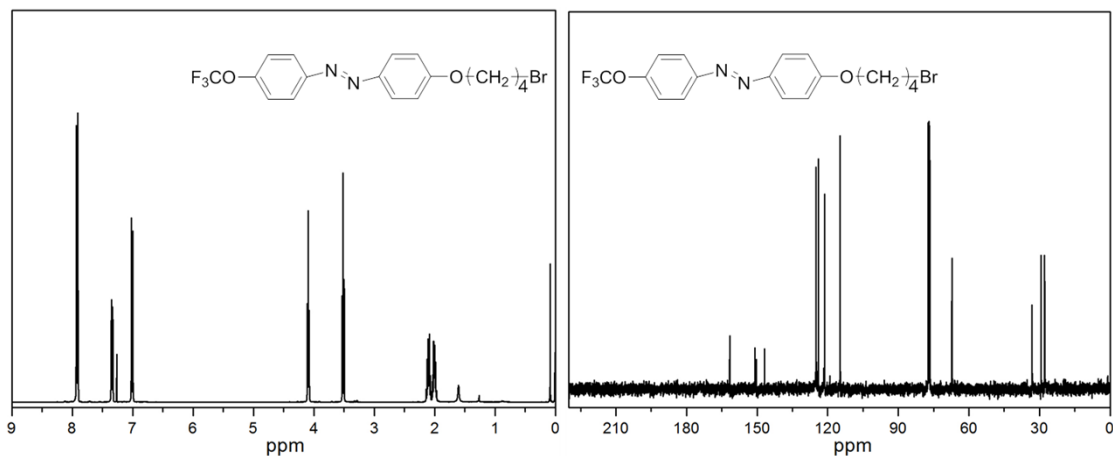

**Fig. S2**  $^1\text{H}$  and  $^{13}\text{C}$  NMR (in  $\text{CDCl}_3$ ) spectra of compound 2

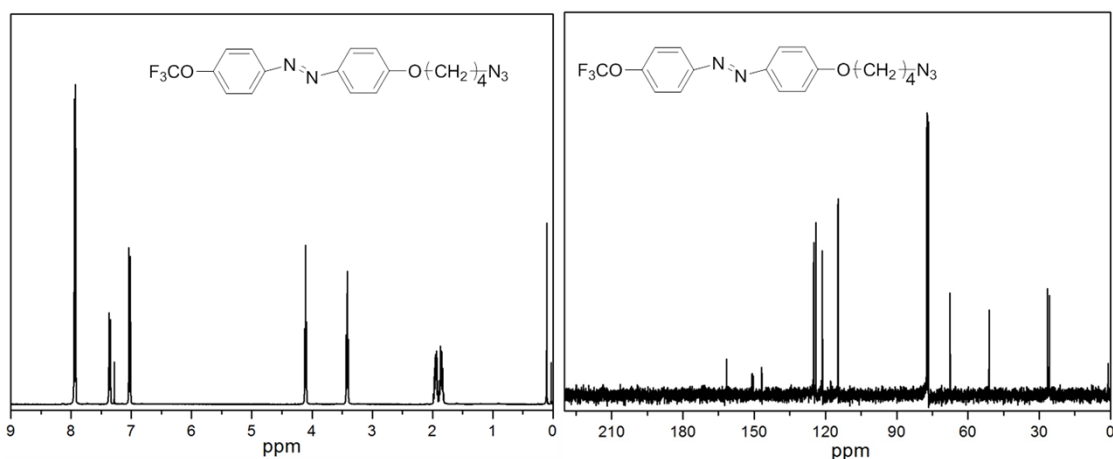

**Fig. S3**  $^1\text{H}$  and  $^{13}\text{C}$  NMR (in  $\text{CDCl}_3$ ) spectra of Azo- $\text{N}_3$

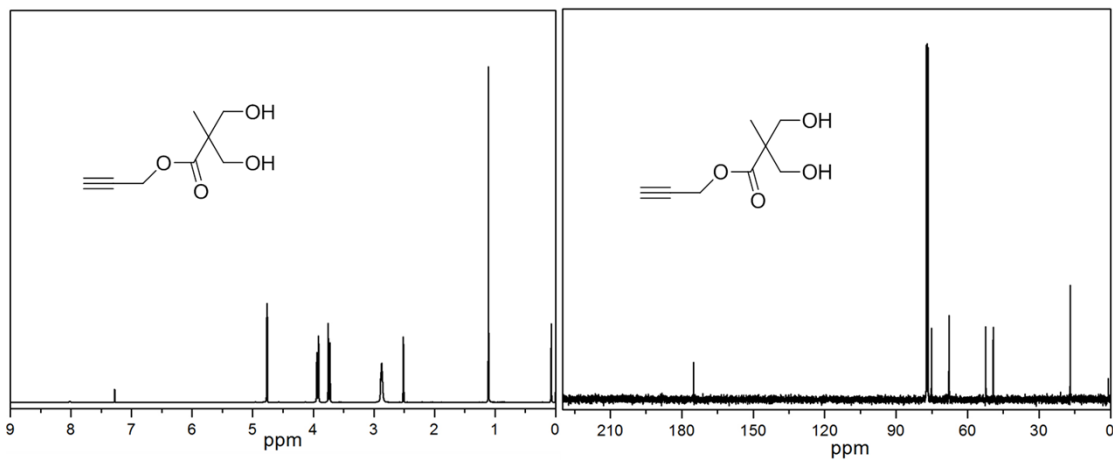

**Fig. S4**  $^1\text{H}$  and  $^{13}\text{C}$  NMR (in  $\text{CDCl}_3$ ) spectra of compound 3

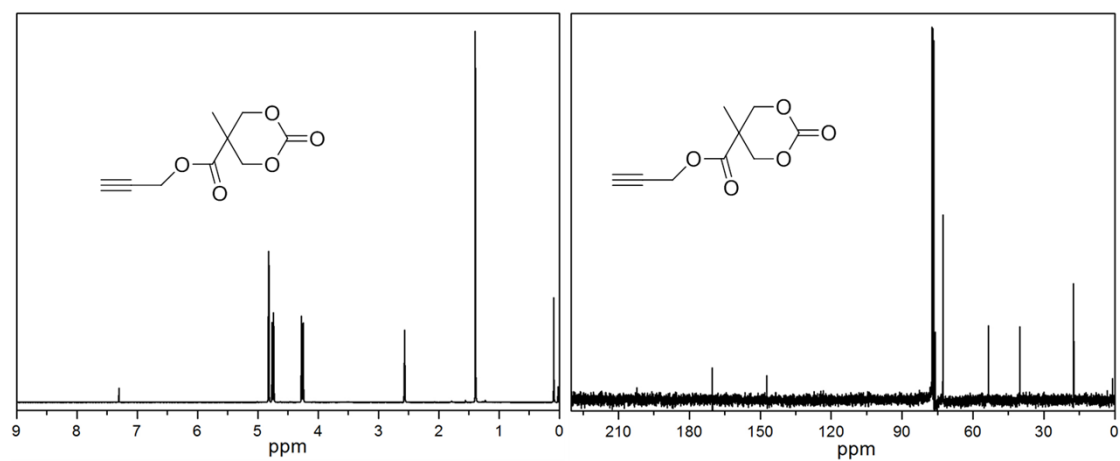

**Fig. S5** <sup>1</sup>H and <sup>13</sup>C NMR (in CDCl<sub>3</sub>) spectra of MPC

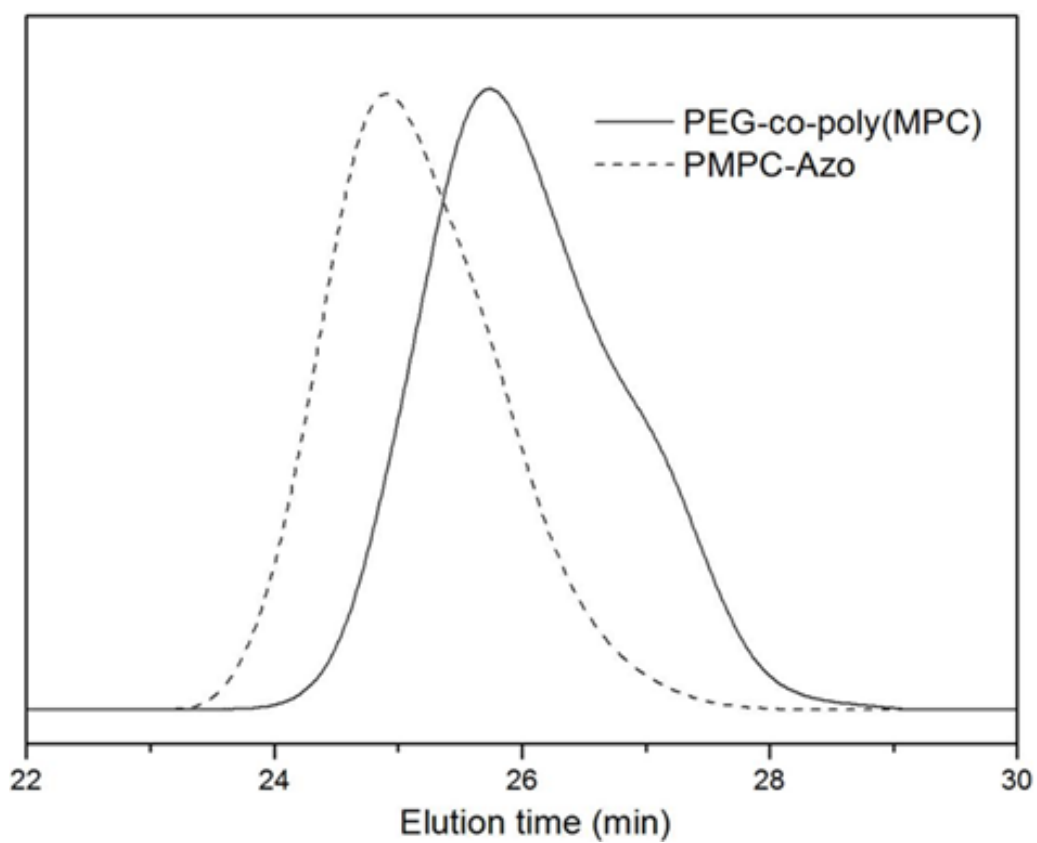

**Fig. S6** GPC traces of mPEG-*b*-poly(MPC) (solid line) and PMPC-Azo (dash line)

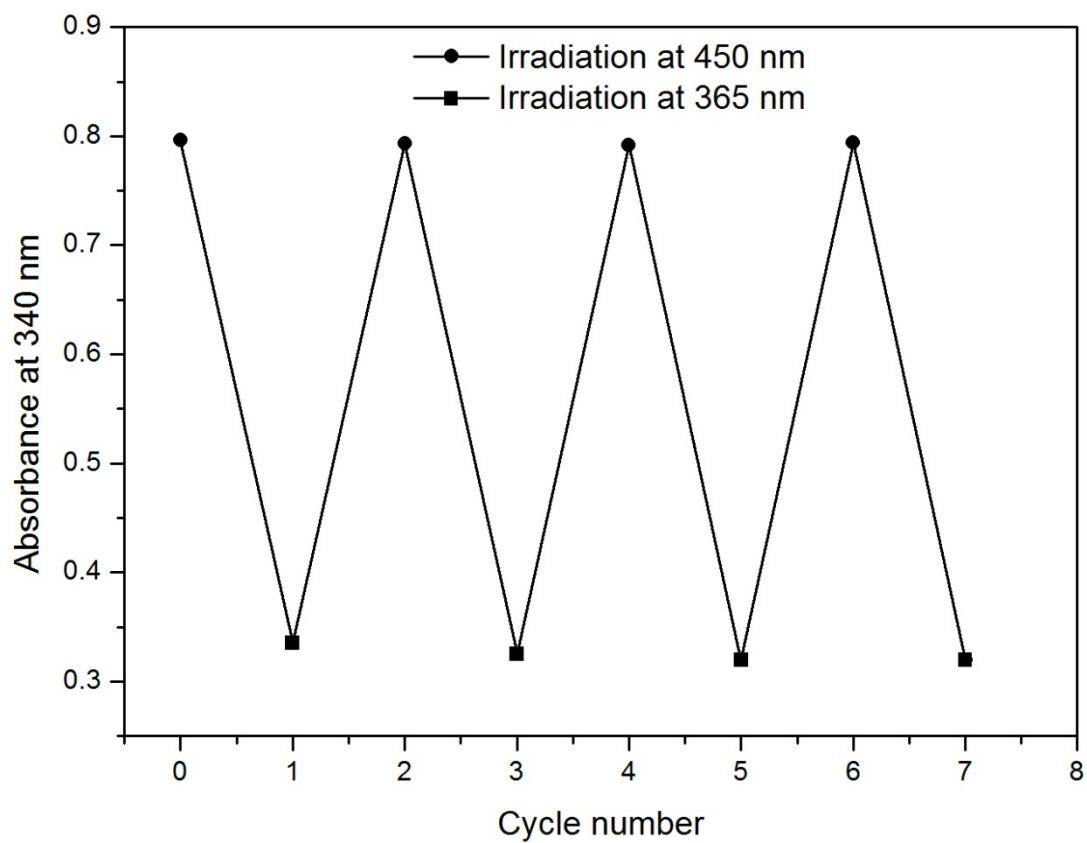

**Fig. S7** Photo-isomerization cycles of UV absorbance for the PMPC-Azo micelles at 340 nm
